# Supplementary material for: A novel hybrid supercapacitor with a carbon nanotube cathode and an iron oxide/carbon nanotube composite anode
Source: Royal Society of Chemistry journal article supplement (doi:10.1039/b909779a), 2009-01-01
Supplement: b909779a.pdf [file b909779a.pdf]

Electronic Supplementary Information for A  
Novel Hybrid Supercapacitor with a Carbon  
Nanotube Cathode and an Iron Oxide/Carbon  
Nanotube Composite Anode

September 4, 2009

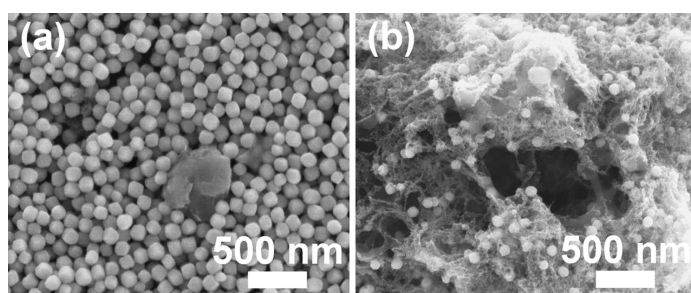

**Fig. 1** (Figure S1) SEM images of (a)  $\alpha$ -Fe<sub>2</sub>O<sub>3</sub> and (b)  $\alpha$ -Fe<sub>2</sub>O<sub>3</sub>/MWNT (3:1 w/w) composite synthesized by the hydrothermal method without CTAB, showing a change from spherical to cuboidal or polyhedral morphology and a broadening of sizes.

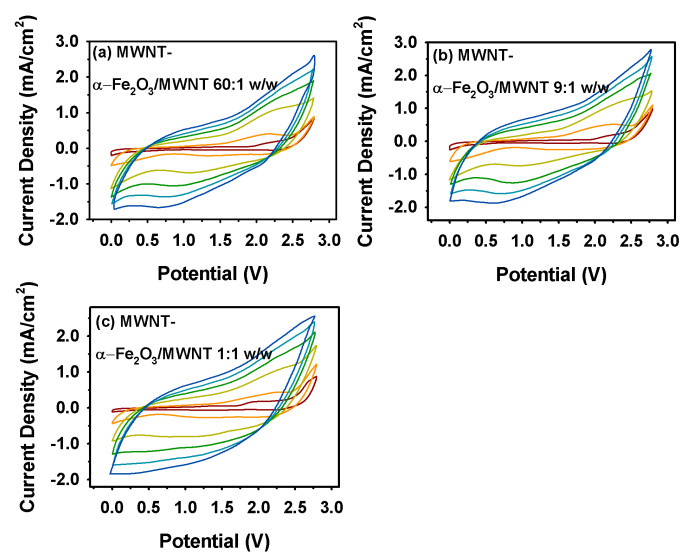

**Fig. 2** (Figure S2) Cyclic voltammograms of supercapacitors with a MWNT cathode and a (a)  $\alpha\text{-Fe}_2\text{O}_3/\text{MWNT}$  (60:1 w/w) composite anode, (b)  $\alpha\text{-Fe}_2\text{O}_3/\text{MWNT}$  (9:1 w/w) composite anode and (c)  $\alpha\text{-Fe}_2\text{O}_3/\text{MWNT}$  (1:1 w/w) composite anode.
